# Supplementary material
Source: PubMed Central journal article supplement (PMC5161637)
Supplement: NIHMS815184-supplement-supp_guide.pdf [file NIHMS815184-supplement-supp_guide.pdf]

## Supplementary Information Guide for :

### **Mosquito larvicide BinAB revealed by *de novo* phasing with an X-ray laser**

by Colletier, Sawaya, Gingery Rodriguez, Cascio, Brewster, Michels-Clark, Hice, Coquelle, Boutet, Williams, Messerschmidt, DePonte, Sierra, Laksmono, Koglin, Hunter, Park, Uervirojnangkoorn, Bideshi, Brunger, Federici, Sauter, Eisenberg

The supplementary information ([in pdf format](#)) of this paper includes:

- Supplementary Discussion
- Supplementary Table 1: **BinA Structure-Function Summary Table**
- Supplementary Table 2: **BinB Structure-Function Summary Table**
- Supplementary Table 3: **Contacts between BinA (x,y,z) and BinB (x,y,z) < 4Å**
- Supplementary Table 4: **Contacts between BinA (x,y,z) and BinA (x+1/2,-y+1/2,-z) < 4Å**
- Supplementary Table 5: **Contacts between BinA (x,y,z) and BinB (x-1/2,-y+1/2,-z) < 4Å**
- Supplementary Table 6: **Contacts between BinA (x,y,z) and BinB (-x+2, y-1/2,-z+1/2) < 4Å**
- Supplementary Table 7: **Contacts between BinA (x,y,z) and BinB (-x+5/2, -y,-z+1/2) < 4Å**
- Supplementary Table 8: **Contacts between BinB (x,y,z) and BinB (-x+2, y-1/2,-z+1/2) < 4Å**
- Supplementary Table 9: **Contacts between BinB (x,y,z) and BinB (x, y-1, z) < 4Å**
- Supplementary Table 10: **Terminal propeptide segments and their contributions to the heterodimer interface.**
- Supplementary Table 11: **Negative and positive  $F_o^{[pH10]} - F_o^{[pH7]}$  peaks observed on BinA.**
- Supplementary Table 12: **Negative and positive  $F_o^{[pH10]} - F_o^{[pH7]}$  peaks observed on BinB.**
- Supplementary Table 13: **Toxicity of wild type (BinAB) and mutated (BinA<sup>D22N</sup>B) strains of *Lysinibacillus sphaericus* against 4<sup>th</sup>-instar larvae of *Culex quinquefasciatus***
- Supplementary Table 14: **Refinement statistics for the model obtained from Molecular Replacement.**
