# Supplementary material
Source: PubMed Central journal article supplement (PMC5161637)
Supplement: NIHMS815184-supplement-supp_tables.pdf [file NIHMS815184-supplement-supp_tables.pdf]

**Supplementary Table 1 | BinA Structure-Function Summary Table**

| Domain and Subdomain boundaries              |                                                        |                                                                                                                                                                                                                                                                                                                                                                                               |                                                                                                                                                                                                                                                                                                                                                   |                             |                            |                      |       |                      |                                                                                                                                                                                                                                                                                                       |
|----------------------------------------------|--------------------------------------------------------|-----------------------------------------------------------------------------------------------------------------------------------------------------------------------------------------------------------------------------------------------------------------------------------------------------------------------------------------------------------------------------------------------|---------------------------------------------------------------------------------------------------------------------------------------------------------------------------------------------------------------------------------------------------------------------------------------------------------------------------------------------------|-----------------------------|----------------------------|----------------------|-------|----------------------|-------------------------------------------------------------------------------------------------------------------------------------------------------------------------------------------------------------------------------------------------------------------------------------------------------|
| M1-F10 <sup>18</sup>                         | N-terminal pro-peptide                                 |                                                                                                                                                                                                                                                                                                                                                                                               | In the native structure (pH 7), the N-terminal propeptide of BinA folds into a alpha-helix that fits in a hydrophobic groove at the surface of BinB, in-between its PFD and C-terminal pro-peptide. In the pH 10 structure, the propeptide (L3-F10) is observed in an extended conformation, which could increase its accessibility to proteases. |                             |                            |                      |       |                      |                                                                                                                                                                                                                                                                                                       |
| I11-L157                                     | Trefoil                                                |                                                                                                                                                                                                                                                                                                                                                                                               | Trefoil domain.                                                                                                                                                                                                                                                                                                                                   |                             |                            |                      |       |                      |                                                                                                                                                                                                                                                                                                       |
| P158-F353                                    | PFD                                                    |                                                                                                                                                                                                                                                                                                                                                                                               | Pore-forming domain.                                                                                                                                                                                                                                                                                                                              |                             |                            |                      |       |                      |                                                                                                                                                                                                                                                                                                       |
| K241-E296                                    | TM sub-domain of the PFD                               |                                                                                                                                                                                                                                                                                                                                                                                               | In the complex structure, residues K241-E296 participate both in cementing the interaction between the trefoil and PFD domains of BinA, and in the dimerization with BinB.                                                                                                                                                                        |                             |                            |                      |       |                      |                                                                                                                                                                                                                                                                                                       |
| A354-N370 <sup>18</sup>                      | C-terminal pro-peptide                                 |                                                                                                                                                                                                                                                                                                                                                                                               | Residues 354-365 (out of 354-370) of BinA C-terminal propeptide are visible in the electron density.                                                                                                                                                                                                                                              |                             |                            |                      |       |                      |                                                                                                                                                                                                                                                                                                       |
| Mutations (engineered or naturally observed) |                                                        |                                                                                                                                                                                                                                                                                                                                                                                               |                                                                                                                                                                                                                                                                                                                                                   |                             |                            |                      |       |                      |                                                                                                                                                                                                                                                                                                       |
| Mutation (with respect to strain A2)         | Domain                                                 | Putative effect in structure                                                                                                                                                                                                                                                                                                                                                                  | Effect on toxicity ( <i>Culex</i> species)                                                                                                                                                                                                                                                                                                        | Effect on complex formation | Effect on receptor binding | Effect on host range | A / B | Reference            | Notes and Remark                                                                                                                                                                                                                                                                                      |
| C31S/A<br>C47S/A                             | Trefoil cap ( $\alpha$ carbohydrate-binding module)    | Rupture of this disulphide bridge will likely result in destabilization of the $\alpha$ carbohydrate-binding module.                                                                                                                                                                                                                                                                          | Non toxic                                                                                                                                                                                                                                                                                                                                         | None                        | Presumably none *          | n/a                  | n     | <sup>2</sup>         | That this mutation is active supports the hypothesis that the $\alpha$ - module participates in the toxic action of BinA.                                                                                                                                                                             |
| S48N (strain 5)                              | Trefoil cap ( $\alpha$ carbohydrate-binding module)    | This residue is constitutive of the $\alpha$ carbohydrate-binding module.                                                                                                                                                                                                                                                                                                                     | Toxic                                                                                                                                                                                                                                                                                                                                             | None                        | Presumably none            | n/a                  | n     | <sup>5,19,20</sup>   | That this mutation is active supports the hypothesis that the $\alpha$ - module participates in the toxic action of BinA.                                                                                                                                                                             |
| N52H/A                                       | Trefoil cap ( $\alpha$ carbohydrate-binding module)    | This residue is constitutive of the $\alpha$ carbohydrate-binding module. Specifically, it supports the structuration of the adjacent trefoil sub-domain by hydrogen bonding its side chain nitrogen to the carbonyl oxygen of A34 (2.8 Å)                                                                                                                                                    | Slightly reduced toxicity                                                                                                                                                                                                                                                                                                                         | Presumably none             | Minor                      | n/a                  | n     | <sup>1</sup>         | That this mutation is active supports the hypothesis that the $\alpha$ - module participates in the toxic action of BinA.                                                                                                                                                                             |
| Q53                                          | Trefoil cap ( $\alpha$ carbohydrate-binding module)    | This residue is constitutive of the $\alpha$ carbohydrate-binding module. Specifically, its side chain nitrogen and oxygen H-bond to the main chain oxygen and nitrogen of I46 and S47, respectively.                                                                                                                                                                                         | Slightly reduced toxicity                                                                                                                                                                                                                                                                                                                         | Presumably none             | Minor                      | n/a                  | n     | <sup>1</sup>         | That this mutation is active supports the hypothesis that the $\alpha$ - module participates in the toxic action of BinA.                                                                                                                                                                             |
| L93S (strain 4)                              | Trefoil cap ( $\beta$ carbohydrate-binding module)     | This residue is constitutive of the $\beta$ carbohydrate-binding module. Replacement by a serine would open a route to the hydrophobic core of the trefoil domain (F96, I110), possibly resulting in a collapse of the trefoil domain. It could also perturb the structure of the cap by destabilizing the F96-E114 beta-hairpin. Residues F96-A104 have been shown to encode the host range. | Non toxic                                                                                                                                                                                                                                                                                                                                         | None                        | Presumably none            | n/a                  | n     | <sup>3,5,19,20</sup> | <b>L93S renders the toxin inactive</b> and may suppress BinA toxicity by three independent mechanisms. First, by inducing a collapse of the trefoil domain. Second, by disrupting the $\beta$ carbohydrate-binding module. Third, by diminishing the host range of BinA, encoded around position 100. |
| R97A                                         | Trefoil barrel (site IIIa carbohydrate-binding module) | R97 is at the beginning of a beta-hairpin (F96-E114) that contacts BinB. R97 does not, however, contribute to the interaction itself, nor does it directly participate to the folding of the trefoil. R97 is part of the site IIIa carbohydrate-binding module.                                                                                                                               | Non toxic                                                                                                                                                                                                                                                                                                                                         | None                        | Presumably none            | n/a                  | n     | <sup>4</sup>         | That the R97A mutation suppresses toxicity supports the hypothesis that site IIIa is involved in the toxic function of BinA. <b>Site IIIa could be key to the host range.</b>                                                                                                                         |
| E98A                                         | Trefoil barrel (inside surface)                        | E98 faces the interior of the barrel. Its OE1 and OE2 atoms are at 3.0 and 3.2 Å away from E14-OE1 and R19-NH1, respectively. E98-OE1 is also at 3.1 Å from Gln336-OE1. The mutation could thus effect either by reducing complexation with BinB or by destabilizing the barrel structure of BinA.                                                                                            | Reduced toxicity                                                                                                                                                                                                                                                                                                                                  | None                        | Presumably none            |                      | y     | <sup>4</sup>         |                                                                                                                                                                                                                                                                                                       |

|                                    |                                                            |                                                                                                                                                                                                                                                                                                                                                                                                                                                                                                                                                               |                           |                                                                            |                 |                    |   |                      |                                                                                                                                                                                                                                                                              |
|------------------------------------|------------------------------------------------------------|---------------------------------------------------------------------------------------------------------------------------------------------------------------------------------------------------------------------------------------------------------------------------------------------------------------------------------------------------------------------------------------------------------------------------------------------------------------------------------------------------------------------------------------------------------------|---------------------------|----------------------------------------------------------------------------|-----------------|--------------------|---|----------------------|------------------------------------------------------------------------------------------------------------------------------------------------------------------------------------------------------------------------------------------------------------------------------|
| V99F (strain 3)                    | Trefoil barrel (site IIIa carbohydrate-binding module)     | V99 is part of the site IIIa module. That its replacement by a Phe results in only slightly reduced toxicity highlights that a hydrophobic residue is required at this site to allow interaction with the host.                                                                                                                                                                                                                                                                                                                                               | Slightly reduced toxicity | None                                                                       | Presumably none | Reduced host range | y | <sup>3,5,19,20</sup> | That the V99A mutation reduces toxicity supports the hypothesis that site IIIa is involved in the toxic function of BinA. <b>Site IIIa could be key to the host range.</b>                                                                                                   |
| R101A                              | Trefoil barrel (outside surface)                           | R101 supports the architecture of the trefoil domain by stabilizing its last loop (T136-K150) through hydrogen-bonding interactions between its NH1 and NH2 atoms with carbonyl oxygens of N142 (3.1 Å distance) and I139 (2.8 Å distance), respectively. Furthermore, its main chain oxygen is involved in the BinAB dimer interface (Supplementary Table 4).                                                                                                                                                                                                | Slightly reduced toxicity | Reduced complexation                                                       | Presumably none | n/a                | y | <sup>4</sup>         | The mutation only slightly affects the toxicity of BinA, while the effect on the interaction with BinB is dramatic. This suggests that mutating R101 into an alanine results in a somewhat different trefoil structure that does not interact in the same fashion with BinB. |
| A104E/S (strain 1 / strains 3 & 4) | Trefoil barrel (outside surface)                           | A104 is at the tip of a beta-hairpin that establishes contact with BinB. Together with M103, it contributes to complexation with BinB; specifically, A104 establishes hydrophobic contact with BinB I446.                                                                                                                                                                                                                                                                                                                                                     | Reduced toxicity          | These mutations are likely to weaken the interaction between BinA and BinB | Presumably none | Reduced host range | y | <sup>3,5,19,20</sup> | This mutation is found in strains 1 and 3, which are both less active than strain 2 and display smaller host ranges. It is also found in strain 4.                                                                                                                           |
| E114A                              | Trefoil barrel (outside surface)                           | E114 sits at the tip of beta hairpin (T105-E123) that is involved in the formation of both the site IIIa and $\gamma$ carbohydrate-binding modules. Yet, the residue is neither part of the two modules, nor involved in complexation with BinB or crystal packing.                                                                                                                                                                                                                                                                                           | Reduced toxicity          | Presumably none                                                            | Presumably none | Presumably none    | n | <sup>4</sup>         | It is unclear in which fashion E114 contributes to the toxicity of BinA. The proximity with the site IIIa and $\gamma$ modules suggests E114 could be involved in the toxic function of BinA.                                                                                |
| P124T (strain 5)                   | Trefoil cap ( $\gamma$ carbohydrate-binding module)        | P124 cycle is stacked above the aromatic cycle of F23 (closest distance between non-H atoms: 3.7 Å) and is constitutive of the $\gamma$ carbohydrate-binding module. Mutation into a threonine is not expected to disrupt the folding of the trefoil.                                                                                                                                                                                                                                                                                                         | Toxic                     | Presumably none                                                            | Presumably none | Presumably none    | n | <sup>5,19,20</sup>   | This strain was tested on <i>Culex</i> species only; hence, it remains to be determined whether the mutation could also affect the host range.                                                                                                                               |
| H125N (strains 3 and 4)            | Trefoil cap ( $\gamma$ carbohydrate-binding module)        | H125 cycle is stacked over Y334 aromatic cycle (distance between two closest non-H atoms: 3.5 Å) and is constitutive of the $\gamma$ carbohydrate-binding module. The mutation into an asparagine is not expected to impact the structure of the trefoil domain, nor the complexation with BinB, but could affect binding into the $\gamma$ module. Of note, H125 is also involved in crystal packing interaction (Supplementary Table 8); the mutation could thus impact crystal formation.                                                                  | Toxic                     | Presumably none                                                            | Presumably none | Reduced host range | n | <sup>5,19,20</sup>   | This mutation is found in strain 3, which are both less active than strain 2 and displays smaller host ranges. It is also found in the inactive strain 4.                                                                                                                    |
| Y135F (strains 3 and 4)            | Trefoil cap                                                | Y135 is found at the pinnacle of the trefoil cap, at the junction between the $\alpha$ -, $\beta$ -, and $\gamma$ -carbohydrate binding modules. Specifically, Y135 stabilizes the cap of the trefoil domain by contributing an hydrogen bond between its hydroxyl oxygen and H33 main chain nitrogen. This H-bond directly associates the $\alpha$ - and $\gamma$ -carbohydrate binding modules. The Y135F mutation would effect in suppressing this hydrogen bond. Hydrophobic interactions within the trefoil cap pinnacle would however remain unchanged. | Toxic                     | Presumably none                                                            | Presumably none | Presumably none    | n | <sup>5,19,20</sup>   | The effect on receptor binding, toxicity, host range, and complex formation is unknown, but presumably insignificant.                                                                                                                                                        |
| C195A                              | Loop-helix motif in the upper-part of the PFD sheet domain | C195 is at the second residue of a loop-helix motif that spans residues P194-Y213 and which contributes to the major interface between the trefoil and PFD domain. C195 sulphur sits in a hydrophobic pocket and supports the folding of into an alpha helix of                                                                                                                                                                                                                                                                                               | Reduced toxicity          | Presumably none                                                            | Presumably none | Presumably none    | n | <sup>2</sup>         | By reinforcing the hydrophobicity at the interface between the trefoil and the PFD domains, the C195A mutation strengthens the stabilization of the trefoil domain over the PFD.                                                                                             |

|                   |                                                            |                                                                                                                                                                                                                                                                                                                                                                                                                                                          |                   |                  |                 |                 |   |                    |                                                                                                                                                                                                                                                                                                                                                                                                                                                                                                                                                                                                                                                                                                                                                          |
|-------------------|------------------------------------------------------------|----------------------------------------------------------------------------------------------------------------------------------------------------------------------------------------------------------------------------------------------------------------------------------------------------------------------------------------------------------------------------------------------------------------------------------------------------------|-------------------|------------------|-----------------|-----------------|---|--------------------|----------------------------------------------------------------------------------------------------------------------------------------------------------------------------------------------------------------------------------------------------------------------------------------------------------------------------------------------------------------------------------------------------------------------------------------------------------------------------------------------------------------------------------------------------------------------------------------------------------------------------------------------------------------------------------------------------------------------------------------------------------|
|                   |                                                            | segment I202-P212. Of note, the other interface is contributed by residues G269-K284, belonging to the TM of the PFD (K241-E296) and which participate both in associating the trefoil and PFD domains of BinA, and in the dimerization with BinB.                                                                                                                                                                                                       |                   |                  |                 |                 |   |                    |                                                                                                                                                                                                                                                                                                                                                                                                                                                                                                                                                                                                                                                                                                                                                          |
| M197R (strain 6)  | Loop-helix motif in the upper-part of the PFD sheet domain | M197 is found at the hydrophobic interface between the between the trefoil and the PFD domain of BinA. Its replacement by an arginine is likely to provoke instability at the interface between the two domains. That this strain is more toxic than the others, which all bear a methionine at this position, suggest that disruption of the interaction between the trefoil and the PFD domain is an important step in carrying on the toxic activity. | <b>More toxic</b> | Presumably none  | Presumably none | Presumably none | n | <sup>5,19,20</sup> | That this mutation result in increased toxicity suggests that a destabilization the interface between the PFD and the trefoil could be involved in the toxic action, e.g. by allowing a hinge motion of the trefoil over the PFD that could be required for pore formation by BinA. Interestingly, a methionine is found at the equivalent position in Cry35Ab1, a structurally related insecticidal toxin from <i>B. thuringiensis</i> . In BinB, which is not toxic, the equivalent residue is an isoleucine and the overall region is more hydrophobic. This observation supports the hypothesis that the relative hydrophobicity of this residue (and by extension, of the interface between the trefoil and the PFD) controls the toxicity of BinA. |
| R267K             | TM subdomain of the PFD                                    | This residue is found in the middle of the putative TM domain of the PFD (K241-E296) and participates in the dimerization with BinB. R267 features a hydrogen bond to BinA T290 main chain oxygen, highlighting the role of R267 in self-stabilizing the TM. The mutation into a Lys is not expected to affect the function of BinA, given that the latter H-bond would be preserved. It should also not affect the dimerization with BinB.              | Toxic             | Presumably none  | Presumably none | Presumably none | y | <sup>5,19,20</sup> |                                                                                                                                                                                                                                                                                                                                                                                                                                                                                                                                                                                                                                                                                                                                                          |
| 293-LLI-295 → AAA | TM subdomain of the PFD                                    | This stretch of hydrophobic residues is found the C-terminal end of the TM subdomain of the PFD. I295 directly contacts I141 from BinB, thus weakly participating to complex formation. L294 faces the interior of the TM (K241-E296), which it stabilizes by hydrophobic interaction with buried residues I244, I260 and F264.                                                                                                                          | Reduced toxicity. | Presumably weak. | Presumably none | Presumably none | n | <sup>1</sup>       | The mutations could affect the proper folding of BinA, which would explain the observed reduction of toxicity. By reducing the hydrophobicity of the TM, these mutations could also affect pore formation.                                                                                                                                                                                                                                                                                                                                                                                                                                                                                                                                               |
| E302I/A           | Sandwich subdomain of the PFD                              | This residue is found at the very end of the PFD domain, remote from regions involved in complexation with BinB.                                                                                                                                                                                                                                                                                                                                         | <b>Non toxic</b>  | Presumably none  | Presumably none | Presumably none | n | <sup>1</sup>       | The mutations are not expected to affect folding of BinA nor crystal packing and complexation with BinB. Thus, they probably abolish the toxic function by impeaching interaction with the host.                                                                                                                                                                                                                                                                                                                                                                                                                                                                                                                                                         |
| R312K/H/I/A       | Sandwich subdomain of the PFD                              | R312 is found at the very end of the PFD domain, remote from the regions involved in the complexation with BinB. As compared to E302, R312 faces the other side of the PFD.                                                                                                                                                                                                                                                                              | <b>Non toxic</b>  | Presumably none  | Presumably none | Presumably none | n | <sup>1</sup>       | The mutations are not expected to affect folding of BinA nor crystal packing and complexation with BinB. Thus, they probably abolish the toxic function by impeaching interaction with the host.                                                                                                                                                                                                                                                                                                                                                                                                                                                                                                                                                         |
| 325-HH-327 → AA   | Sandwich subdomain of the PFD                              | The two residues are found in the PFD, just below the loop-helix motif P194-Y213. Likely, it is by destabilizing the latter subdomain that these mutations suppress the toxin toxicity.                                                                                                                                                                                                                                                                  | <b>Non toxic</b>  | Presumably none  | Presumably none | Presumably none | n | <sup>1</sup>       |                                                                                                                                                                                                                                                                                                                                                                                                                                                                                                                                                                                                                                                                                                                                                          |

Supplementary Table 2 | BinB Structure-Function Summary Table

| Domain and Subdomain boundaries              |                                       |                                                                                                                                                                                                                                                                                                                                                                                                                            |                                                                                                                                                                            |                                                                            |                                                                       |                      |       |           |                                                                                                                                                                                                                                                                                                                                                                                                      |
|----------------------------------------------|---------------------------------------|----------------------------------------------------------------------------------------------------------------------------------------------------------------------------------------------------------------------------------------------------------------------------------------------------------------------------------------------------------------------------------------------------------------------------|----------------------------------------------------------------------------------------------------------------------------------------------------------------------------|----------------------------------------------------------------------------|-----------------------------------------------------------------------|----------------------|-------|-----------|------------------------------------------------------------------------------------------------------------------------------------------------------------------------------------------------------------------------------------------------------------------------------------------------------------------------------------------------------------------------------------------------------|
| M1-Y21 <sup>659</sup>                        | N-terminal propeptide                 |                                                                                                                                                                                                                                                                                                                                                                                                                            | None of the residues from BinB N-terminal propeptides are visible in electron density maps.                                                                                |                                                                            |                                                                       |                      |       |           |                                                                                                                                                                                                                                                                                                                                                                                                      |
| P35-I201                                     | Trefoil                               |                                                                                                                                                                                                                                                                                                                                                                                                                            | Trefoil domain.                                                                                                                                                            |                                                                            |                                                                       |                      |       |           |                                                                                                                                                                                                                                                                                                                                                                                                      |
| P202-Y395                                    | PFD                                   |                                                                                                                                                                                                                                                                                                                                                                                                                            | Pore-forming domain.                                                                                                                                                       |                                                                            |                                                                       |                      |       |           |                                                                                                                                                                                                                                                                                                                                                                                                      |
| T289-E343                                    | TM sub-domain of the PFD              |                                                                                                                                                                                                                                                                                                                                                                                                                            | In the complex structure, residues T289-E343 participate both in cementing the interaction between the trefoil and PFD domains of BinB, and in the dimerization with BinA. |                                                                            |                                                                       |                      |       |           |                                                                                                                                                                                                                                                                                                                                                                                                      |
| P396-Q448 <sup>659</sup>                     | C-terminal propeptide                 |                                                                                                                                                                                                                                                                                                                                                                                                                            | The entire propeptide is visible in the electron density.                                                                                                                  |                                                                            |                                                                       |                      |       |           |                                                                                                                                                                                                                                                                                                                                                                                                      |
| Mutations (engineered or naturally observed) |                                       |                                                                                                                                                                                                                                                                                                                                                                                                                            |                                                                                                                                                                            |                                                                            |                                                                       |                      |       |           |                                                                                                                                                                                                                                                                                                                                                                                                      |
| Mutation (with respect to strain A2)         | Domain                                | Putative effect in structure                                                                                                                                                                                                                                                                                                                                                                                               | Effect on toxicity ( <i>Culex</i> species)                                                                                                                                 | Effect on complex formation                                                | Effect on receptor binding                                            | Effect on host range | A / B | Reference | Notes and Remark                                                                                                                                                                                                                                                                                                                                                                                     |
| 16-KK-17 → AA<br>16-KKK-18 → AAA             | N-terminal propeptide (residues 1-21) | n/a                                                                                                                                                                                                                                                                                                                                                                                                                        | Toxic                                                                                                                                                                      | Presumably none                                                            | Presumably none                                                       | Presumably none      | n     | 1         | In the complex structure of BinAB, residues 1-27 are not visible, implying that they do not participate in dimerization nor in crystal packing interactions. Residues 19-27 have been observed in the structure of activated BinB, where they display a strange L-shaped fold that is involved in crystal packing interactions. Thus, residues 1-27 are probably not involved in the toxic function. |
| 32-YNL-34 → AAA                              | Trefoil                               | Y32 and L34 participate in consolidating the interaction surface between the trefoil domain and the PFD domain. The hydroxyl oxygen of Y32 H-bonds to I326 main chain nitrogen and L238 main chain oxygen, whereas L34 sits in a hydrophobic pocket delimited by L88, I201, Y260 and the carbons atoms of K39. N33 participates to the biological dimerization by contributing an hydrogen bond to T285 main chain oxygen. | Non-toxic                                                                                                                                                                  | These mutations are likely to weaken the interaction between BinA and BinB | These mutations are likely to weaken binding of BinB to the receptor  | Presumably none      | y     | 1,21      | The three residues are crucial. A destabilization of the contact interface between the trefoil and the PFD domain is likely to affect both the binding of BinB to the receptor, and the dimerization with BinA. Specifically, BinA N33 is central to the dimerization with BinB (Supplementary Table 4). It is thus not surprising that the triple mutant show no activity.                          |
| 35-PEI-37 → AAA                              | Trefoil                               | P35 contributes a kink that corresponds to the transition between the N-terminal loop and the trefoil domain. Residues P35-K39 are indeed folded as an alpha helix, whereas K40 starts the first beta-strand of the trefoil domain.                                                                                                                                                                                        | Non-Toxic                                                                                                                                                                  | Presumably none                                                            | None                                                                  | Presumably none      | y     | 21-23     | While P35A, E36A and I37A each retain toxicity, the triple mutant is completely inactive. Since this mutant retains the ability to bind to the receptor, the likelihood is high that P35A, E36A and I37A are involved in another step required for the toxicity.                                                                                                                                     |
| 38-SKK-40 → AAA                              | Trefoil                               | These residues are located in the short alpha-helix motif that connects the N-terminal loop to the first strand of the trefoil domain. The mutations are likely to affect the proper folding of BinB trefoil. In addition, K39 and K40 are involved in crystal packing interactions (Supplementary Table 9).                                                                                                               | Non-toxic                                                                                                                                                                  | Presumably none                                                            | None                                                                  | Presumably none      | N     | 1,21,22   | While completely inactive, this mutant retains the ability to bind to the receptor, suggesting that residues 38-40 are involved in another step required for the toxicity.                                                                                                                                                                                                                           |
| 41-FYN-43 → AAA                              | Trefoil barrel (outside surface)      | These residues are found on one of the strands constitutive of the barrel. Their side chains are located on the outside surface of the barrel.                                                                                                                                                                                                                                                                             | Non-toxic                                                                                                                                                                  | Presumably none                                                            | The mutation could effect by disrupting the receptor epitope on BinB. | Presumably none      | n     | 23        | While F41A, Y42A and I43A each retain toxicity, the triple mutant is completely inactive, possibly due to a complete disruption of the receptor epitope on BinB.                                                                                                                                                                                                                                     |
| P35A                                         | Trefoil                               | This residue is located in the short alpha-helix motif that connects the N-terminal loop to the first strand of the trefoil domain. P35 plays a mere supporting role in the dimerization with BinA, suggesting a minor effect on complex formation.                                                                                                                                                                        | Slightly reduced toxicity                                                                                                                                                  | Presumably low.                                                            | Presumably none                                                       | Presumably none      | y     | 12        |                                                                                                                                                                                                                                                                                                                                                                                                      |
| E36A                                         | Trefoil                               | This residue is located in the short alpha-helix motif that connect the N-terminal loop to the first strand of the trefoil domain.                                                                                                                                                                                                                                                                                         | Slightly reduced toxicity                                                                                                                                                  | Presumably none                                                            | Presumably none                                                       | Presumably none      | n     | 12        |                                                                                                                                                                                                                                                                                                                                                                                                      |
| I37A                                         | Trefoil                               | This residue is located in the short alpha-helix motif that connect the N-terminal loop to the first strand of the trefoil domain.                                                                                                                                                                                                                                                                                         | Toxic                                                                                                                                                                      | Presumably none                                                            | Presumably none                                                       | Presumably none      | n     | 12        |                                                                                                                                                                                                                                                                                                                                                                                                      |

|                   |                                  |                                                                                                                                                                                                                                                                                                                                                                                                                                     |                      |                                                                              |                                                                       |                 |   |               |                                                                                                                                                                                                                                                          |
|-------------------|----------------------------------|-------------------------------------------------------------------------------------------------------------------------------------------------------------------------------------------------------------------------------------------------------------------------------------------------------------------------------------------------------------------------------------------------------------------------------------|----------------------|------------------------------------------------------------------------------|-----------------------------------------------------------------------|-----------------|---|---------------|----------------------------------------------------------------------------------------------------------------------------------------------------------------------------------------------------------------------------------------------------------|
| F41A              | Trefoil barrel (outside surface) | This residue is found on the outside surface of the trefoil barrel.                                                                                                                                                                                                                                                                                                                                                                 | Reduced toxicity     | Presumably none                                                              | The mutation could effect by disrupting the receptor epitope on BinB. | Presumably none | n | <sup>12</sup> |                                                                                                                                                                                                                                                          |
| Y42A              | Trefoil barrel (outside surface) | This residue is found on the outside surface of the trefoil barrel.                                                                                                                                                                                                                                                                                                                                                                 | Reduced toxicity     | Presumably none                                                              | The mutation could effect by disrupting the receptor epitope on BinB. | Presumably none | n | <sup>12</sup> |                                                                                                                                                                                                                                                          |
| N43A              | Trefoil barrel (outside surface) | This residue is found on the outside surface of the trefoil barrel.                                                                                                                                                                                                                                                                                                                                                                 | Toxic                | Presumably none                                                              | Presumably none                                                       | Presumably none | n | <sup>12</sup> |                                                                                                                                                                                                                                                          |
| 52-GYG-54 → AAA   | Trefoil barrel                   | The residues are located in a beta-turn of the trefoil domain. Since it was shown that the block mutation does not impact binding to the receptor, these residues are likely not involved in receptor binding.                                                                                                                                                                                                                      | Presumably toxic     | Presumably none                                                              | Presumably none                                                       | Presumably none | n | <sup>22</sup> |                                                                                                                                                                                                                                                          |
| C67A/S<br>C161A/S | Trefoil cap                      | C67 is located in the S56-M75 beta-hairpin, and C161 in the N160-T168 beta-turn. The C67-C161 disulphide bridge tethers in place a loop that prevents access to the α module.                                                                                                                                                                                                                                                       | Non-toxic            | Presumably none                                                              | These mutations likely abolish the binding of BinB to the receptor.   | Presumably none | n | <sup>7</sup>  |                                                                                                                                                                                                                                                          |
| 81-PRF-83 → AAA   | Trefoil cap                      | These residues are C-terminal to the α carbohydrate-binding module. Since it was shown that this mutation does not impact the binding to the receptor, the trefoil sub-domain of which they are a part is probably not involved in receptor binding. Of note, these residues are involved in crystal packing interactions with another BinB molecule.                                                                               | Presumably toxic     | Presumably none                                                              | Presumably none                                                       | Presumably none | n | <sup>8</sup>  |                                                                                                                                                                                                                                                          |
| 85-IRF-87 → AAA   | Trefoil barrel                   | These residues are found on one of the strands constitutive of the barrel. R86 faces the inside of trefoil barrel, whereas I85 and F87 contribute to its outside surface. Together with F41 and I95, the latter contribute a large hydrophobic surface that glues over PFD residues I242, T259, Y260 and M255. The block mutation likely affects both the structuration of the trefoil barrel (R86) and its cementing over the PFD. | Presumably not toxic | Presumably reduced (unfolded BinB likely presents reduced affinity for BinA) | These mutations abolish the binding of BinB to the receptor           | Presumably none | n | <sup>8</sup>  | The mutation could prevent the proper folding of BinB into a two-domain toxin, thus preventing dimerization with BinA. That binding to the receptor is abolished furthermore suggests that these residues could be part of the receptor epitope on BinB. |
| 111-YLD-113 → AAA | Trefoil cap                      | The residues are located in a loop at the surface of the trefoil cap and are probably not involved in receptor binding.                                                                                                                                                                                                                                                                                                             | Toxic                | Presumably none                                                              | None                                                                  | Presumably none | n | <sup>21</sup> |                                                                                                                                                                                                                                                          |
| 115-NNH-117 → AAA | Trefoil cap                      | The residues are located in a loop at the surface of the trefoil cap and are probably not involved in receptor binding.                                                                                                                                                                                                                                                                                                             | Toxic                | Presumably none                                                              | None                                                                  | Presumably none | n | <sup>21</sup> |                                                                                                                                                                                                                                                          |
| N114A             | Trefoil cap                      | The residues are located in a loop at the surface of the trefoil cap and are probably not involved in receptor binding.                                                                                                                                                                                                                                                                                                             | Toxic                | Presumably none                                                              | None                                                                  | Presumably none | n | <sup>21</sup> |                                                                                                                                                                                                                                                          |
| 143-GEQ-145 → AAA | Trefoil barrel (outside surface) | These residues are located in a loop that contacts BinA. The mutation is thus expected to weaken the binding of BinB to BinA.                                                                                                                                                                                                                                                                                                       | Reduced toxicity     | Presumably reduced                                                           | Presumably reduced                                                    | Presumably none | n | <sup>21</sup> | The S137-F146 loop is folded back onto the trefoil domain in the structure of activated BinB without BinA (3WA1)                                                                                                                                         |
| F146A             | Trefoil barrel (outside surface) | F146 is exposed at the surface of the trefoil domain. Given that this mutation does not affect binding to BinA nor the toxicity, it is likely that F146 is not part of the receptor's binding site.                                                                                                                                                                                                                                 | Toxic                | Presumably none                                                              | None                                                                  | Presumably none | n | <sup>21</sup> |                                                                                                                                                                                                                                                          |
| 147-FQF-149 → AAA | Trefoil barrel (inside surface)  | These residues are found on one of the strands constitutive of the trefoil barrel. Q148 faces the outside of barrel, whereas I85 and F87 contribute to its core. The block mutation renders the toxin unable to bind to the receptor. The loss of                                                                                                                                                                                   | Presumably not toxic | Presumably reduced (unfolded BinB likely presents                            | These mutations abolish the binding of BinB to the receptor           | Presumably none | n | <sup>8</sup>  |                                                                                                                                                                                                                                                          |

|                     |                                                            |                                                                                                                                                                                                                                                                                                                                                                                                                                                        |                             |                            |                                                             |                 |   |               |                                                              |
|---------------------|------------------------------------------------------------|--------------------------------------------------------------------------------------------------------------------------------------------------------------------------------------------------------------------------------------------------------------------------------------------------------------------------------------------------------------------------------------------------------------------------------------------------------|-----------------------------|----------------------------|-------------------------------------------------------------|-----------------|---|---------------|--------------------------------------------------------------|
|                     |                                                            | binding activity could be due an improper folding of the trefoil domain or to the disruption of the receptor epitope on BinB.                                                                                                                                                                                                                                                                                                                          |                             | reduced affinity for BinA) |                                                             |                 |   |               |                                                              |
| 147-FQFY-150 → AAAA | Trefoil barrel (inside surface)                            | These residues are found on one of the strands constitutive of the barrel. Q148 and Y150 face the outside of the barrel, whereas I85 and F87 contribute to its core. The block mutation renders the toxin unable to bind to the receptor. The loss of binding activity could be due an improper folding of the trefoil domain or to the disruption of the receptor epitope on BinB.                                                                    | Not toxic                   | Presumably reduced         | These mutations abolish the binding of BinB to the receptor | Presumably none | n | <sup>21</sup> |                                                              |
| F147A               | Trefoil barrel (inside surface)                            | This mutant present reduced activity. The reduced binding activity could be due an improper folding of the trefoil domain or to the disruption of the receptor epitope on BinB.                                                                                                                                                                                                                                                                        | Reduced toxicity            | Presumably reduced         | Slightly reduced binding of BinB to the receptor            | Presumably none | n | <sup>21</sup> |                                                              |
| Q148A               | Trefoil barrel (outside surface)                           | This mutant present reduced activity. The reduced binding activity could be due an improper folding of the trefoil domain or to the disruption of the receptor epitope on BinB.                                                                                                                                                                                                                                                                        | Reduced toxicity            | Presumably reduced         | Slightly reduced binding of BinB to the receptor            | Presumably none | n | <sup>21</sup> |                                                              |
| F149A               | Trefoil barrel (inside surface)                            | The loss in binding activity could be due an improper folding of the trefoil domain or to the disruption of the receptor epitope on BinB.                                                                                                                                                                                                                                                                                                              | Not toxic                   | Presumably reduced         | Slightly reduced binding of BinB to the receptor            | Presumably none | n | <sup>21</sup> | <b>IMPORTANCE OF AROMATIC RESIDUES AT THIS SPECIFIC LOCI</b> |
| F149Y               | Trefoil barrel (inside surface)                            | That this mutation preserves activity infers that the aromaticity of F149 is crucial at this specific locus, to allow either a proper folding of the trefoil of BinB or recognition by the receptor. F149Y could further stabilize the barrel of BinB by contributing a H-bond to R86 side chain.                                                                                                                                                      | Slightly increased toxicity | Presumably none            | Presumably increased binding                                | Presumably none | n | <sup>21</sup> | <b>IMPORTANCE OF AROMATIC RESIDUES AT THIS SPECIFIC LOCI</b> |
| Y150A               | Trefoil barrel (outside surface)                           | The loss in binding activity could be due an improper folding of the trefoil domain or to the disruption of the receptor epitope on BinB.                                                                                                                                                                                                                                                                                                              | Not toxic                   | Presumably reduced         | Markedly reduced binding of BinB to the receptor            | Presumably none | n | <sup>21</sup> | <b>IMPORTANCE OF AROMATIC RESIDUES AT THIS SPECIFIC LOCI</b> |
| Y150F               | Trefoil barrel (outside surface)                           | That this mutation preserves activity infers that the aromaticity of Y150 is crucial at this specific locus, to allow either a proper folding of the trefoil of BinB or recognition by the receptor. Y150 is part of the site IIIa module of BinB suggesting that this site could play an important role in binding the receptor by hydrophobic interaction.                                                                                           | Slightly increased toxicity | Presumably none            | Presumably increased binding                                | Presumably none | n | <sup>21</sup> | <b>IMPORTANCE OF AROMATIC RESIDUES AT THIS SPECIFIC LOCI</b> |
| 207-TSL-209 → AAA   | Trefoil                                                    | These residues are part of the long beta strand coming all the way from the trefoil domain down to the tip of the PFD (A190-L219). In the complex structure, L209 shows a weak interaction with F6 from BinA's N-terminal loop.                                                                                                                                                                                                                        | Presumably toxic            | Presumably none            | Presumably none                                             | Presumably none | n | <sup>8</sup>  |                                                              |
| 231-RAV-233 → AAA   | PFD                                                        | The residues are part of a beta strand that encompasses the sandwich and sheet sub-domains of the PFD domain. Anecdotally, these residues are spatially close to 207-TSL-209.                                                                                                                                                                                                                                                                          | Presumably toxic            | Presumably none            | Presumably none                                             | Presumably none | n | <sup>8</sup>  |                                                              |
| C241A/S             | Loop-helix motif in the upper-part of the PFD sheet domain | C241 is at the second residue of a loop-helix motif spanning residues P240-Y260 and which contributes to the major interface between the trefoil and PFD domain. C240 sulphur sits in a hydrophobic pocket and supports the folding of segment N251-T259 into an alpha helix, notably by contributing a sulphur-sulphur interaction with M255 side chain. Of note, the two other interfaces that associate the trefoil and PFD domains of BinB are the | Reduced toxicity            | Presumably none            | Presumably none                                             | Presumably none | n | <sup>7</sup>  |                                                              |

|                                                          |                               |                                                                                                                                                                                                                                                                                                                                                                                                                                                                                                                                                                                                                                                                                                                          |                  |                   |                    |                    |   |   |  |
|----------------------------------------------------------|-------------------------------|--------------------------------------------------------------------------------------------------------------------------------------------------------------------------------------------------------------------------------------------------------------------------------------------------------------------------------------------------------------------------------------------------------------------------------------------------------------------------------------------------------------------------------------------------------------------------------------------------------------------------------------------------------------------------------------------------------------------------|------------------|-------------------|--------------------|--------------------|---|---|--|
|                                                          |                               | N-terminal loop and the TM domain (T289-E343). The residue equivalent to C241 in BinB is C195 in BinA. Both sit at the exact same place in the loop–helix motif. It is unclear what the exact role of this region is in BinB.                                                                                                                                                                                                                                                                                                                                                                                                                                                                                            |                  |                   |                    |                    |   |   |  |
| L314H/Y (strain 1 / strain 3)<br>F317L (strains 1 and 3) | TM subdomain of the PFD       | These residues are found in the putative TM subdomain of BinB and are key to determining the host range. The BinAB toxins from strains 1 and 3 are active against <i>Culex pipiens</i> , <i>Culex quinquefasciatus</i> and <i>Anopheles stephensi</i> , but not against <i>Mansonia uniformis</i> , <i>Anopheles aegypti</i> , <i>Aedes atropalpus</i> . The toxin from strain 2 is active against the whole range of hosts. The reverse-engineering of L314 (and F317) in BinAB toxins from strain 1 and strain 3 confers them with the host range of strain 2. In accordance with their likely structural role in toxicity, the two residues are exposed. The equivalent motif in BinA encompasses residues K241-E296. | Reduced toxicity | Presumably none   | Presumably reduced | Reduced host range | n | 5 |  |
| 387-YRL-389 → AAA                                        | Sandwich subdomain of the PFD | These residues are in a beta turn that associate the sandwich, sheet and propeptide domains of the PFD. The hydroxyl oxygen of Y387 interacts with D419 (sandwich/propeptide), while R388 side chain nitrogens H-bond to D310 main chain oxygen (sandwich/sheet) and to R367 and D386 side chains nitrogen and oxygen, respectively (sandwich/sandwich). In addition, L389 contribute to the hydrophobic groove in which, at the surface of BinB, the alpha helix formed by BinA residues F6-E14 sits. Thus, these residues are involved both in maintaining the cohesiveness of the PFD domain and in stabilizing the interaction with BinA. It was shown that these residues have no effect on receptor binding.       | Non-toxic        | Presumably lower  | Presumably lower   | Presumably none    | y | 1 |  |
| 392-IQ-393 → AA                                          | Sandwich subdomain of the PFD | These residues are part of an exposed beta strand of the PFD sandwich. I392 contribute hydrophobic interactions that stabilize the propeptide domain. Q393 is involved in stabilizing the long beta strand coming all the way from the trefoil domain down to the tip of the PFD (A190-L219). Surely, the effect of the Q393A mutation is stronger than that of the I292A.                                                                                                                                                                                                                                                                                                                                               | Non-toxic        | Presumably none   | Presumably lower   | Presumably none    | n | 1 |  |
| 408-KH-409 → AA                                          | C-terminal propeptide         | This mutation affects the trypsin cleavage site of the BinB propeptide and probably lowers the propensity of BinA and BinB to undergo their presumably collective conformational change upon crystal dissolution. That the toxin remains active even in the presence of this large propeptide is in agreement with the hypothesis that the latter is only cleaved after – and not before – binding of BinB to the receptor.                                                                                                                                                                                                                                                                                              | Reduced toxicity | Presumably higher | Presumably lower   | Presumably none    | n | 1 |  |



Supplementary Table 3 | Contacts between BinA (x,y,z) and BinB (x,y,z) &lt; 4Å

| BinA (x,y,z) |             |              |                         |                    |                               | BinB (x,y,z) |             |              |                         |                    |                               | sum area buried (Å <sup>2</sup> ) | closest contact (Å) | interaction type | pH 1.0 sensitive? |
|--------------|-------------|--------------|-------------------------|--------------------|-------------------------------|--------------|-------------|--------------|-------------------------|--------------------|-------------------------------|-----------------------------------|---------------------|------------------|-------------------|
| chain        | residue no. | residue name | atom in closest contact | subdomain location | area buried (Å <sup>2</sup> ) | chain        | residue no. | residue name | atom in closest contact | subdomain location | area buried (Å <sup>2</sup> ) |                                   |                     |                  |                   |
| A            | 3           | ASN          | ND2                     | PEP                | 27.4                          | B            | 212         | ASN          | OD1                     | SAN                | 29.4                          | 56.8                              | 3.5                 | POLR             | N                 |
| A            | 4           | LEU          | CD2                     | PEP                | 23.6                          | B            | 210         | LEU          | CD2                     | SHE                | 22.2                          | 45.8                              | 3.8                 | HPHO             | N                 |
| A            | 4           | LEU          | CD2                     | PEP                | 14.4                          | B            | 211         | GLU          | O                       | SHE                | 4.6                           | 19.0                              | 3.5                 | POLR             | N                 |
| A            | 4           | LEU          | N                       | PEP                | 25.0                          | B            | 212         | ASN          | ND2                     | SAN                | 33.9                          | 58.9                              | 3.5                 | POLR             | N                 |
| A            | 4           | LEU          | CD2                     | PEP                | 14.7                          | B            | 269         | TRP          | CZ2                     | SHE                | 6.4                           | 21.1                              | 3.4                 | HPHO             | N                 |
| A            | 4           | LEU          | CD1                     | PEP                | 13.0                          | B            | 434         | VAL          | CG2                     | PEP                | 13.2                          | 26.2                              | 3.8                 | HPHO             | N                 |
| A            | 7           | ILE          | CG2                     | PEP                | 15.7                          | B            | 210         | LEU          | CD2                     | SHE                | 16.9                          | 32.6                              | 3.8                 | HPHO             | N                 |
| A            | 7           | ILE          | CD1                     | PEP                | 13.5                          | B            | 269         | TRP          | CH2                     | SHE                | 5.2                           | 18.7                              | 3.8                 | HPHO             | N                 |
| A            | 7           | ILE          | CD1                     | PEP                | 15.6                          | B            | 434         | VAL          | CG1                     | PEP                | 12.5                          | 28.1                              | 3.9                 | HPHO             | N                 |
| A            | 8           | ASP          | OD1                     | PEP                | 28.4                          | B            | 234         | LYS          | NZ                      | SHE                | 24.0                          | 52.4                              | 2.9                 | HBND             | N                 |
| A            | 8           | ASP          | OD1                     | PEP                | 20.0                          | B            | 267         | GLU          | OE2                     | SHE                | 7.7                           | 27.7                              | 3.6                 | POLR             | N                 |
| A            | 11          | ILE          | CG2                     | TRF                | 34.5                          | B            | 388         | ARG          | NH2                     | SAN                | 26.2                          | 60.7                              | 4.0                 | POLR             | N                 |
| A            | 11          | ILE          | CG1                     | TRF                | 22.7                          | B            | 389         | LEU          | CD1                     | SAN                | 13.2                          | 35.8                              | 3.9                 | HPHO             | N                 |
| A            | 11          | ILE          | CD1                     | TRF                | 17.2                          | B            | 436         | VAL          | CG1                     | PEP                | 11.7                          | 28.8                              | 3.8                 | HPHO             | N                 |
| A            | 11          | ILE          | CD1                     | TRF                | 21.5                          | B            | 438         | THR          | OG1                     | PEP                | 15.8                          | 37.3                              | 3.9                 | POLR             | N                 |
| A            | 14          | GLU          | CG                      | TRF                | 18.2                          | B            | 336         | GLN          | OE1                     | SHE                | 21.9                          | 40.1                              | 3.4                 | POLR             | N                 |
| A            | 22          | ASP          | OD2                     | TRF                | 12.8                          | B            | 448         | GLN          | O                       | PEP                | 22.8                          | 35.6                              | 2.9                 | HBND             | Y                 |
| A            | 61          | ASP          | O                       | TRF                | 25.3                          | B            | 324         | GLU          | CG                      | TM                 | 26.6                          | 52.0                              | 3.2                 | POLR             | N                 |
| A            | 61          | ASP          | OD1                     | TRF                | 15.5                          | B            | 328         | ARG          | NH2                     | TM                 | 21.2                          | 36.7                              | 3.5                 | POLR             | N                 |
| A            | 62          | ASP          | CA                      | TRF                | 15.0                          | B            | 324         | GLU          | OE2                     | TM                 | 17.1                          | 32.2                              | 3.8                 | POLR             | N                 |
| A            | 98          | GLU          | O                       | TRF                | 28.5                          | B            | 336         | GLN          | NE2                     | SHE                | 35.7                          | 64.2                              | 3.6                 | POLR             | N                 |
| A            | 99          | VAL          | CA                      | TRF                | 8.9                           | B            | 336         | GLN          | O                       | SHE                | 22.9                          | 31.8                              | 3.4                 | POLR             | N                 |
| A            | 100         | LYS          | N                       | TRF                | 28.5                          | B            | 336         | GLN          | O                       | SHE                | 47.6                          | 76.1                              | 2.8                 | HBND             | N                 |
| A            | 100         | LYS          | O                       | TRF                | 19.4                          | B            | 337         | THR          | OG1                     | SHE                | 10.1                          | 29.5                              | 3.0                 | HBND             | N                 |
| A            | 100         | LYS          | CB                      | TRF                | 19.6                          | B            | 418         | TYR          | OH                      | PEP                | 23.7                          | 43.3                              | 3.6                 | POLR             | N                 |
| A            | 101         | ARG          | O                       | TRF                | 13.0                          | B            | 418         | TYR          | CD1                     | PEP                | 15.8                          | 28.7                              | 3.4                 | POLR             | N                 |
| A            | 102         | THR          | CG2                     | TRF                | 9.7                           | B            | 417         | SER          | O                       | PEP                | 12.3                          | 21.9                              | 3.9                 | POLR             | N                 |
| A            | 102         | THR          | CA                      | TRF                | 26.3                          | B            | 418         | TYR          | O                       | PEP                | 26.4                          | 52.6                              | 3.5                 | POLR             | N                 |
| A            | 103         | MET          | N                       | TRF                | 37.5                          | B            | 418         | TYR          | O                       | PEP                | 26.9                          | 64.4                              | 2.9                 | HBND             | N                 |
| A            | 103         | MET          | SD                      | TRF                | 18.5                          | B            | 446         | ILE          | CD1                     | PEP                | 19.4                          | 37.9                              | 3.7                 | POLR             | N                 |



|   |     |     |     |     |      |   |     |     |     |     |      |      |     |      |   |
|---|-----|-----|-----|-----|------|---|-----|-----|-----|-----|------|------|-----|------|---|
| A | 103 | MET | CE  | TRF | 24.5 | B | 419 | ASP | OD2 | PEP | 14.8 | 39.3 | 3.2 | POLR | N |
| A | 103 | MET | CE  | TRF | 12.0 | B | 387 | TYR | OH  | SAN | 3.5  | 15.5 | 3.8 | POLR | N |
| A | 104 | ALA | CB  | TRF | 22.9 | B | 446 | ILE | CG1 | PEP | 19.2 | 42.1 | 3.7 | HPHO | N |
| A | 104 | ALA | CB  | TRF | 13.3 | B | 421 | HIS | NE2 | PEP | 8.7  | 22.0 | 4.0 | POLR | N |
| A | 148 | SER | OG  | TRF | 16.0 | B | 448 | GLN | O   | PEP | 21.9 | 37.9 | 3.2 | POLR | N |
| A | 149 | ASN | O   | TRF | 15.7 | B | 447 | ASN | ND2 | PEP | 22.4 | 38.1 | 2.8 | HBND | N |
| A | 150 | LYS | O   | TRF | 17.4 | B | 447 | ASN | O   | PEP | 24.2 | 41.6 | 3.4 | POLR | N |
| A | 150 | LYS | CG  | TRF | 15.7 | B | 448 | GLN | OXT | PEP | 24.9 | 40.6 | 3.5 | POLR | N |
| A | 152 | GLN | OE1 | TRF | 20.3 | B | 447 | ASN | ND2 | PEP | 22.3 | 42.6 | 3.2 | HBND | N |
| A | 262 | ALA | CB  | TM  | 30.1 | B | 140 | TYR | CD1 | TRF | 24.0 | 54.1 | 3.6 | HPHO | N |
| A | 263 | ASP | CB  | TM  | 19.3 | B | 140 | TYR | CE2 | TRF | 21.6 | 40.8 | 3.9 | HPHO | N |
| A | 277 | GLY | C   | TM  | 23.1 | B | 328 | ARG | NH2 | TM  | 24.9 | 48.0 | 3.5 | POLR | N |
| A | 278 | GLY | N   | TM  | 11.3 | B | 328 | ARG | NH2 | TM  | 19.0 | 30.3 | 3.7 | POLR | N |
| A | 280 | THR | O   | TM  | 5.7  | B | 33  | ASN | ND2 | TRF | 14.6 | 20.3 | 3.1 | HBND | N |
| A | 281 | TYR | CE2 | TM  | 14.1 | B | 31  | ASN | O   | TRF | 22.5 | 36.6 | 3.6 | POLR | N |
| A | 281 | TYR | CE2 | TM  | 21.3 | B | 32  | TYR | O   | TRF | 13.9 | 35.2 | 3.7 | POLR | N |
| A | 281 | TYR | OH  | TM  | 31.3 | B | 328 | ARG | O   | TM  | 36.3 | 67.6 | 3.5 | POLR | W |
| A | 281 | TYR | OH  | TM  | 17.3 | B | 329 | GLY | CA  | TM  | 12.7 | 30.0 | 3.5 | POLR | N |
| A | 284 | LYS | NZ  | TM  | 33.5 | B | 31  | ASN | O   | TRF | 34.4 | 67.9 | 2.8 | HBND | N |
| A | 284 | LYS | C   | TM  | 25.6 | B | 33  | ASN | OD1 | TRF | 26.2 | 51.8 | 3.7 | POLR | N |
| A | 285 | THR | O   | TM  | 3.8  | B | 33  | ASN | ND2 | TRF | 14.5 | 18.3 | 2.8 | HBND | N |
| A | 286 | GLN | NE2 | TM  | 30.6 | B | 33  | ASN | ND2 | TRF | 17.2 | 47.9 | 3.1 | HBND | N |
| A | 286 | GLN | OE1 | TM  | 27.1 | B | 35  | PRO | CG  | TRF | 26.2 | 53.3 | 3.4 | POLR | N |
| A | 289 | ASN | ND2 | SHE | 34.4 | B | 134 | GLN | O   | TRF | 30.5 | 64.9 | 2.8 | HBND | N |
| A | 289 | ASN | O   | SHE | 22.5 | B | 135 | VAL | CA  | TRF | 6.9  | 29.4 | 3.4 | POLR | N |
| A | 289 | ASN | O   | SHE | 24.2 | B | 136 | GLY | N   | TRF | 14.9 | 39.1 | 2.8 | HBND | N |
| A | 290 | THR | OG1 | SHE | 12.3 | B | 136 | GLY | O   | TRF | 15.9 | 28.2 | 3.0 | HBND | N |
| A | 290 | THR | CB  | SHE | 12.2 | B | 140 | TYR | OH  | TRF | 19.4 | 31.6 | 3.6 | POLR | N |
| A | 292 | GLN | NE2 | SHE | 21.9 | B | 138 | GLY | O   | TRF | 24.6 | 46.5 | 2.8 | HBND | N |
| A | 297 | THR | OG1 | SAN | 14.9 | B | 141 | ILE | CG2 | TRF | 24.3 | 39.2 | 3.4 | POLR | N |
| A | 299 | TYR | OH  | SAN | 26.1 | B | 141 | ILE | O   | TRF | 28.7 | 54.8 | 2.7 | HBND | Y |
| A | 364 | ILE | CD1 | PEP | 25.2 | B | 141 | ILE | CD1 | TRF | 22.8 | 48.0 | 3.8 | HPHO | N |
| A | 364 | ILE | CD1 | PEP | 15.8 | B | 142 | THR | CG2 | TRF | 12.0 | 27.8 | 3.8 | HPHO | N |

Supplementary Table 4 | Contacts between BinA (x,y,z) and BinA (x+1/2,-y+1/2,-z) &lt; 4Å

| BinA (x,y,z) |             |              |                         |                    |                               | BinA (x+1/2,-y+1/2,-z) |             |              |                         |                    |                               | sum area buried (Å <sup>2</sup> ) | closest contact (Å) | interaction type | pH 10 sensitive? |
|--------------|-------------|--------------|-------------------------|--------------------|-------------------------------|------------------------|-------------|--------------|-------------------------|--------------------|-------------------------------|-----------------------------------|---------------------|------------------|------------------|
| chain        | residue no. | residue name | atom in closest contact | subdomain location | area buried (Å <sup>2</sup> ) | chain                  | residue no. | residue name | atom in closest contact | subdomain location | area buried (Å <sup>2</sup> ) |                                   |                     |                  |                  |
| A            | 24          | TYR          | OH                      | TRF                | 16.2                          | A                      | 329         | GLY          | O                       | SHE                | 17.4                          | 33.6                              | 3.8                 | POLR             | W                |
| A            | 27          | GLU          | OE1                     | TRF                | 23.1                          | A                      | 184         | GLU          | CB                      | SHE                | 25.9                          | 49                                | 4                   | POLR             | N                |
| A            | 27          | GLU          | OE2                     | TRF                | 31.1                          | A                      | 164         | GLU          | CD                      | SHE                | 34.2                          | 65.2                              | 3.3                 | POLR             | N                |
| A            | 28          | TYR          | CE1                     | TRF                | 37.4                          | A                      | 184         | GLU          | OE2                     | SHE                | 36.7                          | 74.1                              | 3.4                 | POLR             | N                |
| A            | 102         | THR          | CG2                     | TRF                | 18.7                          | A                      | 328         | ASP          | OD2                     | SHE                | 13.6                          | 32.3                              | 3.8                 | POLR             | N                |
| A            | 102         | THR          | CG2                     | TRF                | 20.3                          | A                      | 330         | THR          | CG2                     | SHE                | 16.7                          | 37                                | 3.4                 | HPHO             | N                |
| A            | 141         | ASN          | O                       | TRF                | 21.4                          | A                      | 158         | PRO          | CA                      | SHE                | 8.6                           | 29.9                              | 3.4                 | POLR             | N                |
| A            | 141         | ASN          | O                       | TRF                | 19.4                          | A                      | 159         | SER          | N                       | SHE                | 15.5                          | 35                                | 3.3                 | POLR             | N                |
| A            | 141         | ASN          | OD1                     | TRF                | 25.7                          | A                      | 327         | SER          | O                       | SHE                | 29.4                          | 55.1                              | 3.4                 | POLR             | N                |
| A            | 141         | ASN          | OD1                     | TRF                | 15.5                          | A                      | 328         | ASP          | N                       | SHE                | 15.3                          | 30.8                              | 3.9                 | POLR             | N                |
| A            | 141         | ASN          | ND2                     | TRF                | 16.1                          | A                      | 156         | THR          | O                       | TRF                | 22.6                          | 38.8                              | 3.6                 | POLR             | N                |
| A            | 142         | ASN          | OD1                     | TRF                | 8.9                           | A                      | 159         | SER          | OG                      | SHE                | 23.1                          | 32                                | 3.2                 | POLR             | N                |
| A            | 143         | SER          | N                       | TRF                | 19.5                          | A                      | 159         | SER          | OG                      | SHE                | 21.6                          | 41.1                              | 3.1                 | HBND             | N                |
| A            | 144         | ASN          | ND2                     | TRF                | 13.3                          | A                      | 159         | SER          | OG                      | SHE                | 12.3                          | 25.5                              | 3.9                 | POLR             | N                |

Supplementary Table 5 | Contacts between BinA (x,y,z) and BinB (x-1/2,-y+1/2,-z) &lt; 4Å

| BinA (x,y,z) |             |              |                         |                    |                               | BinB (x-1/2,-y+1/2,-z) |             |              |                         |                    |                               | sum area buried (Å <sup>2</sup> ) | closest contact (Å) | interaction type | pH 1.0 sensitive? |
|--------------|-------------|--------------|-------------------------|--------------------|-------------------------------|------------------------|-------------|--------------|-------------------------|--------------------|-------------------------------|-----------------------------------|---------------------|------------------|-------------------|
| chain        | residue no. | residue name | atom in closest contact | subdomain location | area buried (Å <sup>2</sup> ) | chain                  | residue no. | residue name | atom in closest contact | subdomain location | area buried (Å <sup>2</sup> ) |                                   |                     |                  |                   |
| A            | 201         | PHE          | CB                      | SHE                | 32.8                          | B                      | 411         | ILE          | O                       | PEP                | 34.2                          | 67                                | 3.4                 | POLR             | N                 |
| A            | 201         | PHE          | CB                      | SHE                | 17.8                          | B                      | 412         | ILE          | O                       | PEP                | 16.9                          | 34.7                              | 3.3                 | POLR             | N                 |
| A            | 201         | PHE          | O                       | SHE                | 17.8                          | B                      | 413         | ARG          | CA                      | PEP                | 7.4                           | 25.3                              | 3.7                 | POLR             | N                 |
| A            | 201         | PHE          | CD1                     | SHE                | 30.8                          | B                      | 414         | CYS          | O                       | PEP                | 17.7                          | 48.5                              | 3.4                 | POLR             | N                 |
| A            | 201         | PHE          | CE1                     | SHE                | 12.7                          | B                      | 416         | ASN          | O                       | PEP                | 6.2                           | 18.9                              | 3.7                 | POLR             | N                 |
| A            | 202         | ILE          | CG1                     | SHE                | 7.2                           | B                      | 414         | CYS          | O                       | PEP                | 12.7                          | 19.9                              | 3.4                 | POLR             | N                 |
| A            | 203         | SER          | OG                      | SHE                | 18.3                          | B                      | 415         | GLU          | OE1                     | PEP                | 27.9                          | 46.2                              | 3                   | HBND             | N                 |
| A            | 206         | GLU          | CG                      | SHE                | 32.4                          | B                      | 415         | GLU          | O                       | PEP                | 31.2                          | 63.6                              | 3.3                 | POLR             | N                 |
| A            | 326         | ARG          | NH1                     | SHE                | 15                            | B                      | 417         | SER          | CB                      | PEP                | 23                            | 37.9                              | 3.7                 | POLR             | N                 |
| A            | 328         | ASP          | OD2                     | SHE                | 24.5                          | B                      | 417         | SER          | OG                      | PEP                | 19.5                          | 44                                | 2.6                 | HBND             | N                 |
| A            | 330         | THR          | OG1                     | SHE                | 12.7                          | B                      | 417         | SER          | CB                      | PEP                | 20.1                          | 32.9                              | 3.9                 | POLR             | N                 |
| A            | 331         | GLN          | OE1                     | SHE                | 38                            | B                      | 444         | PRO          | CB                      | PEP                | 39.5                          | 77.6                              | 4                   | POLR             | N                 |
| A            | 334         | THR          | O                       | SHE                | 35.8                          | B                      | 443         | ILE          | CG2                     | PEP                | 33.8                          | 69.6                              | 3.9                 | POLR             | N                 |
| A            | 334         | THR          | OG1                     | SHE                | 29.5                          | B                      | 422         | ILE          | CD1                     | PEP                | 24.6                          | 54.1                              | 3.9                 | POLR             | N                 |

Supplementary Table 6 | Contacts between BinA (x,y,z) and BinB (-x+2, y-1/2, -z+1/2) &lt; 4Å

| BinA (x,y,z) |             |              |                         |                    |                               | BinB (-x+2, y-1/2, -z+1/2) |             |              |                         |                    |                               | sum area buried (Å <sup>2</sup> ) | closest contact (Å) | interaction type | pH 1.0 sensitive? |
|--------------|-------------|--------------|-------------------------|--------------------|-------------------------------|----------------------------|-------------|--------------|-------------------------|--------------------|-------------------------------|-----------------------------------|---------------------|------------------|-------------------|
| chain        | residue no. | residue name | atom in closest contact | subdomain location | area buried (Å <sup>2</sup> ) | chain                      | residue no. | residue name | atom in closest contact | subdomain location | area buried (Å <sup>2</sup> ) |                                   |                     |                  |                   |
| A            | 233         | GLY          | O                       | SAN                | 23.7                          | B                          | 294         | VAL          | CG1                     | SHE                | 19                            | 42.7                              | 3.9                 | POLR             | N                 |
| A            | 306         | THR          | CB                      | SAN                | 19.9                          | B                          | 292         | SER          | OG                      | SHE                | 20.9                          | 40.8                              | 3.6                 | POLR             | N                 |
| A            | 306         | THR          | CG2                     | SAN                | 16.9                          | B                          | 294         | VAL          | CG2                     | SHE                | 23.7                          | 40.6                              | 3.9                 | HPHO             | N                 |
| A            | 307         | GLU          | OE2                     | SAN                | 16                            | B                          | 288         | ARG          | NH2                     | SAN                | 19.2                          | 35.2                              | 3.1                 | HBND             | N                 |
| A            | 307         | GLU          | OE1                     | SAN                | 10.6                          | B                          | 343         | GLU          | OE2                     | SAN                | 9.2                           | 19.9                              | 3.5                 | POLR             | N                 |
| A            | 307         | GLU          | OE1                     | SAN                | 12.3                          | B                          | 413         | ARG          | NH2                     | PEP                | 18                            | 30.3                              | 2.9                 | HBND             | N                 |
| A            | 308         | ASN          | ND2                     | SAN                | 28.4                          | B                          | 293         | GLU          | OE2                     | SHE                | 25.8                          | 54.2                              | 3.6                 | POLR             | N                 |
| A            | 309         | PHE          | CE2                     | SAN                | 8.7                           | B                          | 413         | ARG          | NH2                     | PEP                | 12.2                          | 20.9                              | 4                   | POLR             | N                 |
| A            | 343         | ASN          | O                       | SAN                | 27.9                          | B                          | 227         | LYS          | NZ                      | SHE                | 27.7                          | 55.6                              | 3.6                 | POLR             | N                 |
| A            | 353         | PHE          | O                       | SAN                | 22.1                          | B                          | 286         | GLN          | OE1                     | SAN                | 27.5                          | 49.6                              | 3.7                 | POLR             | N                 |
| A            | 353         | PHE          | O                       | SAN                | 18.5                          | B                          | 288         | ARG          | NH1                     | SAN                | 12.8                          | 31.3                              | 3.3                 | POLR             | N                 |
| A            | 355         | SER          | CB                      | PEP                | 24.6                          | B                          | 288         | ARG          | NE                      | SAN                | 23.4                          | 48                                | 3.4                 | POLR             | N                 |
| A            | 355         | SER          | OG                      | PEP                | 5.1                           | B                          | 343         | GLU          | OE1                     | SAN                | 4.2                           | 9.3                               | 5                   | POLR             | N                 |
| A            | 358         | LEU          | CD2                     | PEP                | 16.6                          | B                          | 295         | VAL          | CG2                     | SHE                | 18.6                          | 35.3                              | 3.8                 | HPHO             | N                 |

Supplementary Table 7 | Contacts between BinA (x,y,z) and BinB (-x+5/2, -y,-z+1/2) &lt; 4Å

| BinA (x,y,z) |             |              |                         |                    |                               | BinB (-x+5/2, -y,-z+1/2) |             |              |                         |                    |                               | sum area buried (Å <sup>2</sup> ) | closest contact (Å) | interaction type | pH 1.0 sensitive? |
|--------------|-------------|--------------|-------------------------|--------------------|-------------------------------|--------------------------|-------------|--------------|-------------------------|--------------------|-------------------------------|-----------------------------------|---------------------|------------------|-------------------|
| chain        | residue no. | residue name | atom in closest contact | subdomain location | area buried (Å <sup>2</sup> ) | chain                    | residue no. | residue name | atom in closest contact | subdomain location | area buried (Å <sup>2</sup> ) |                                   |                     |                  |                   |
| A            | 125         | HIS          | ND1                     | TRF                | 13.7                          | B                        | 59          | GLU          | OE2                     | TRF                | 26                            | 39.7                              | 2.8                 | HBND             | N                 |
| A            | 125         | HIS          | C                       | TRF                | 14.8                          | B                        | 60          | PHE          | CZ                      | TRF                | 21.1                          | 35.9                              | 4                   | HPHO             | N                 |
| A            | 126         | SER          | CB                      | TRF                | 12                            | B                        | 60          | PHE          | CZ                      | TRF                | 16                            | 28                                | 3.6                 | HPHO             | N                 |
| A            | 130         | PRO          | O                       | TRF                | 15                            | B                        | 60          | PHE          | CE1                     | TRF                | 14.5                          | 29.5                              | 3.5                 | POLR             | N                 |
| A            | 131         | SER          | CB                      | TRF                | 6.2                           | B                        | 60          | PHE          | CE1                     | TRF                | 18.8                          | 25.1                              | 4                   | HPHO             | N                 |
| A            | 132         | ARG          | NH1                     | TRF                | 18.7                          | B                        | 59          | GLU          | CB                      | TRF                | 18.6                          | 37.3                              | 4                   | POLR             | N                 |
| A            | 134         | TYR          | OH                      | TRF                | 23.4                          | B                        | 59          | GLU          | OE2                     | TRF                | 26.2                          | 49.6                              | 3                   | HBND             | Y                 |

Supplementary Table 8 | Contacts between BinB (x,y,z) and BinB (-x+2, y-1/2, -z+1/2) &lt; 4Å

| BinB (x,y,z) |             |              |                         |                    |                               | BinB (-x+2, y-1/2, -z+1/2) |             |              |                         |                    |                               | sum area buried (Å <sup>2</sup> ) | closest contact (Å) | interaction type | pH 1.0 sensitive? |
|--------------|-------------|--------------|-------------------------|--------------------|-------------------------------|----------------------------|-------------|--------------|-------------------------|--------------------|-------------------------------|-----------------------------------|---------------------|------------------|-------------------|
| chain        | residue no. | residue name | atom in closest contact | subdomain location | area buried (Å <sup>2</sup> ) | chain                      | residue no. | residue name | atom in closest contact | subdomain location | area buried (Å <sup>2</sup> ) |                                   |                     |                  |                   |
| B            | 39          | LYS          | NZ                      | TRF                | 34.7                          | B                          | 217         | THR          | OG1                     | SAN                | 36.2                          | 70.9                              | 2.9                 | HBND             | N                 |
| B            | 39          | LYS          | NZ                      | TRF                | 17                            | B                          | 218         | SER          | OG                      | SAN                | 13.4                          | 30.4                              | 3.3                 | POLR             | N                 |
| B            | 40          | LYS          | CG                      | TRF                | 13.3                          | B                          | 217         | THR          | CG2                     | SAN                | 20.2                          | 33.5                              | 3.7                 | HPHO             | N                 |
| B            | 51          | ASN          | O                       | TRF                | 37.5                          | B                          | 206         | GLN          | NE2                     | SHE                | 47.7                          | 85.2                              | 2.8                 | HBND             | N                 |
| B            | 78          | ASN          | ND2                     | TRF                | 13.5                          | B                          | 206         | GLN          | NE2                     | SHE                | 21.2                          | 34.7                              | 3.2                 | HBND             | N                 |
| B            | 194         | SER          | C                       | TRF                | 20.8                          | B                          | 230         | VAL          | CG2                     | SHE                | 21.2                          | 42                                | 3.9                 | HPHO             | N                 |
| B            | 195         | SER          | OG                      | TRF                | 26.7                          | B                          | 211         | GLU          | OE1                     | SHE                | 19.7                          | 46.4                              | 2.6                 | HBND             | N                 |
| B            | 195         | SER          | OG                      | TRF                | 24                            | B                          | 230         | VAL          | CG1                     | SHE                | 21.2                          | 45.2                              | 3.6                 | POLR             | N                 |
| B            | 196         | PHE          | CE1                     | TRF                | 23.9                          | B                          | 215         | GLU          | O                       | SAN                | 26                            | 50                                | 3.4                 | POLR             | N                 |
| B            | 196         | PHE          | CE2                     | TRF                | 12.8                          | B                          | 224         | VAL          | CG2                     | SAN                | 17.7                          | 30.5                              | 3.9                 | HPHO             | N                 |
| B            | 197         | TYR          | CA                      | TRF                | 24.8                          | B                          | 215         | GLU          | OE2                     | SAN                | 22.1                          | 47                                | 3.6                 | POLR             | N                 |
| B            | 197         | TYR          | OH                      | TRF                | 27.9                          | B                          | 212         | ASN          | OD1                     | SHE                | 36                            | 63.9                              | 2.6                 | HBND             | N                 |
| B            | 198         | ALA          | N                       | TRF                | 26.7                          | B                          | 215         | GLU          | OE2                     | SAN                | 28.5                          | 55.2                              | 2.9                 | HBND             | N                 |
| B            | 198         | ALA          | CB                      | TRF                | 10.7                          | B                          | 216         | PRO          | O                       | SAN                | 6.4                           | 17.1                              | 3.8                 | POLR             | N                 |
| B            | 198         | ALA          | CB                      | TRF                | 14.8                          | B                          | 217         | THR          | CG2                     | SAN                | 15.4                          | 30.2                              | 3.8                 | HPHO             | N                 |
| B            | 201         | ILE          | CD1                     | SHE                | 16.7                          | B                          | 217         | THR          | O                       | SAN                | 17.1                          | 33.8                              | 3.8                 | POLR             | N                 |
| B            | 201         | ILE          | O                       | SHE                | 23                            | B                          | 395         | TYR          | OH                      | SAN                | 24.5                          | 47.6                              | 2.9                 | HBND             | Y                 |
| B            | 202         | PRO          | C                       | SHE                | 2.2                           | B                          | 395         | TYR          | OH                      | SAN                | 14.5                          | 16.7                              | 3.9                 | POLR             | N                 |
| B            | 203         | GLN          | CG                      | SHE                | 26.5                          | B                          | 395         | TYR          | OH                      | SAN                | 24.2                          | 50.7                              | 3.5                 | POLR             | N                 |
| B            | 203         | GLN          | OE1                     | SHE                | 21.7                          | B                          | 356         | LEU          | CD2                     | SAN                | 21.2                          | 42.9                              | 3.5                 | POLR             | N                 |
| B            | 203         | GLN          | OE1                     | SHE                | 21.8                          | B                          | 396         | PRO          | CG                      | PEP                | 17.1                          | 38.9                              | 3.7                 | POLR             | N                 |
| B            | 374         | VAL          | CG1                     | SHE                | 26.2                          | B                          | 400         | ILE          | CD1                     | PEP                | 27.6                          | 53.8                              | 3.8                 | HPHO             | N                 |

Supplementary Table 9 | Contacts between BinB (x,y,z) and BinB (x, y-1, z) &lt; 4Å

| BinB (x,y,z) |             |              |                         |                    |                               | BinB (-x+2, y-1/2, -z+1/2) |             |              |                         |                    |                               | sum area buried (Å <sup>2</sup> ) | closest contact (Å) | interaction type | pH 1.0 sensitive? |
|--------------|-------------|--------------|-------------------------|--------------------|-------------------------------|----------------------------|-------------|--------------|-------------------------|--------------------|-------------------------------|-----------------------------------|---------------------|------------------|-------------------|
| chain        | residue no. | residue name | atom in closest contact | subdomain location | area buried (Å <sup>2</sup> ) | chain                      | residue no. | residue name | atom in closest contact | subdomain location | area buried (Å <sup>2</sup> ) |                                   |                     |                  |                   |
| B            | 50          | ARG          | NH2                     | TRF                | 37.3                          | B                          | 355         | ASP          | CB                      | SAN                | 28.5                          | 65.7                              | 3.6                 | POLR             | N                 |
| B            | 50          | ARG          | NH1                     | TRF                | 40.2                          | B                          | 356         | LEU          | CD2                     | SAN                | 41.5                          | 81.7                              | 3.4                 | POLR             | N                 |
| B            | 184         | SER          | CB                      | TRF                | 31.6                          | B                          | 280         | HIS          | ND1                     | SAN                | 24                            | 55.6                              | 3.6                 | POLR             | N                 |
| B            | 187         | GLN          | OE1                     | TRF                | 19.7                          | B                          | 280         | HIS          | NE2                     | SAN                | 20.9                          | 40.7                              | 3.1                 | HBND             | N                 |
| B            | 187         | GLN          | NE2                     | TRF                | 22.2                          | B                          | 355         | ASP          | OD1                     | SAN                | 23.7                          | 45.9                              | 3.3                 | POLR             | N                 |
| B            | 50          | ARG          | NH2                     | TRF                | 37.3                          | B                          | 355         | ASP          | CB                      | SAN                | 28.5                          | 65.7                              | 3.6                 | POLR             | N                 |
| B            | 50          | ARG          | NH1                     | TRF                | 40.2                          | B                          | 356         | LEU          | CD2                     | SAN                | 41.5                          | 81.7                              | 3.4                 | POLR             | N                 |
| B            | 184         | SER          | CB                      | TRF                | 31.6                          | B                          | 280         | HIS          | ND1                     | SAN                | 24                            | 55.6                              | 3.6                 | POLR             | N                 |



**Supplementary Table 10** | Terminal propeptide segments and their contributions to the heterodimer interface.

| Region     | Propeptide Residue Range (count) | Range observed in map | Heterdimer surface area lost by removing propeptide (Å <sup>2</sup> ) |
|------------|----------------------------------|-----------------------|-----------------------------------------------------------------------|
| BinA-Nterm | 1-10 (10)                        | 1-10 (10)             | 637                                                                   |
| BinA-Cterm | 354-370 (17)                     | 354-365 (12)          | 56                                                                    |
| BinB-Nterm | 1-21 (21)                        | none (0)              | 0                                                                     |
| BinB-Cterm | 396-448 (53)                     | 396-448 (53)          | 948                                                                   |
| total      | (101)                            | (75)                  | 1539                                                                  |

**Supplementary Table 11 | Negative and positive  $F_o^{[pH10]} - F_o^{[pH7]}$  peaks observed on BinA.** Peaks stronger than  $\pm 3.5 \sigma$  were integrated contiguously in the  $F_o^{[pH10]} - F_o^{[pH7]}$  map and then assigned to the closest residue (within a 1.5 Å radius) in the *pH7* (negative peaks) or *pH10* structures (positive peaks).

| Negative peaks |                |           |                          |                                    | Positive peaks |                |           |                          |                                    |
|----------------|----------------|-----------|--------------------------|------------------------------------|----------------|----------------|-----------|--------------------------|------------------------------------|
| Residue name   | Residue number | Atom name | Peak height ( $\sigma$ ) | Integrated peak value ( $\sigma$ ) | Residue name   | Residue number | Atom name | Peak height ( $\sigma$ ) | Integrated peak value ( $\sigma$ ) |
| ASP            | 342            | CG        | -6.08                    | -309.84                            | CYS            | 31             | CB        | 5.53                     | 149.34                             |
| GLY            | 15             | O         | -6.79                    | -251.42                            | ASP            | 22             | CE        | 6.11                     | 123.42                             |
| THR            | 13             | O         | -4.73                    | -165.61                            | ASN            | 112            | CB        | 4.29                     | 118.04                             |
| ARG            | 97             | CG        | -4.82                    | -132.95                            | LYS            | 16             | CA        | 5.45                     | 116.59                             |
| SER            | 9              | OG        | -4.48                    | -88.96                             | GLY            | 15             | O         | 5.09                     | 102.55                             |
| HIS            | 127            | CD2       | -5.04                    | -83.22                             | ASP            | 342            | CA        | 4.97                     | 93.51                              |
| GLU            | 98             | OE2       | -5.08                    | -65.03                             | LYS            | 209            | CA        | 4.44                     | 66.52                              |
| ASN            | 69             | N         | -4.49                    | -62.95                             | ASN            | 142            | O         | 4.59                     | 44.18                              |
| GLU            | 45             | CA        | -4.15                    | -59.29                             | ASN            | 341            | CD1       | 4.22                     | 42.59                              |
| ILE            | 11             | N         | -4.35                    | -58.39                             | ILE            | 139            | OE1       | 4.07                     | 41.51                              |
| SER            | 126            | OG        | -4.25                    | -53.67                             | THR            | 13             | CE2       | 4.30                     | 38.27                              |
| ASN            | 343            | CB        | -4.46                    | -52.56                             | ASP            | 8              | CA        | 4.14                     | 35.31                              |
| LYS            | 16             | CD        | -4.48                    | -50.86                             | PRO            | 12             | CD2       | 4.18                     | 30.90                              |
| TYR            | 344            | CE1       | -4.06                    | -48.45                             | LEU            | 157            | CB        | 4.07                     | 26.96                              |
| ASP            | 22             | CG        | -4.28                    | -39.32                             | GLU            | 98             | CB        | 4.16                     | 26.89                              |
| LEU            | 129            | CB        | -4.29                    | -39.00                             | TYR            | 215            | CB        | 4.04                     | 23.05                              |
| TYR            | 17             | CA        | -4.12                    | -35.19                             | ASN            | 343            | CB        | 4.06                     | 22.49                              |
| GLU            | 98             | CA        | -4.24                    | -34.65                             | PHE            | 30             | O         | 3.97                     | 22.12                              |
| ALA            | 109            | C         | -4.11                    | -29.89                             | ARG            | 64             | N         | 3.94                     | 21.96                              |
| HIS            | 125            | NE2       | -4.11                    | -26.10                             | GLN            | 111            | C         | 4.03                     | 18.98                              |
| ARG            | 120            | NH2       | -3.97                    | -22.28                             | PRO            | 29             | C         | 3.95                     | 18.64                              |
| MET            | 103            | CG        | -3.74                    | -21.52                             | HIS            | 127            | C         | 3.97                     | 18.60                              |
| THR            | 330            | CA        | -4.09                    | -19.26                             | PHE            | 279            | CG2       | 3.98                     | 15.03                              |
| THR            | 102            | CA        | -4.12                    | -19.21                             | SER            | 126            | C         | 3.81                     | 14.67                              |
| ASN            | 52             | CB        | -4.00                    | -18.73                             | ASP            | 118            | CG        | 3.72                     | 14.57                              |
| TYR            | 107            | CA        | -3.95                    | -15.16                             | PRO            | 130            | CG        | 3.87                     | 11.05                              |
| VAL            | 119            | N         | -3.89                    | -14.87                             | LEU            | 340            | ND1       | 3.73                     | 10.85                              |
| TYR            | 213            | C         | -3.79                    | -14.62                             | ILE            | 110            | O         | 3.66                     | 10.74                              |
| LEU            | 108            | CA        | -3.74                    | -14.56                             | SER            | 248            | CG        | 3.59                     | 10.69                              |
| MET            | 208            | C         | -3.86                    | -14.55                             | GLN            | 286            | CZ        | 3.72                     | 7.26                               |
| SER            | 320            | C         | -3.63                    | -14.35                             | PHE            | 96             | CB        | 3.68                     | 7.20                               |
| PHE            | 95             | CB        | -3.66                    | -10.95                             | HIS            | 71             | CE        | 3.63                     | 7.16                               |
| THR            | 210            | CA        | -3.77                    | -10.94                             | ALA            | 121            | CB        | 3.54                     | 7.08                               |
| GLU            | 151            | N         | -3.85                    | -7.53                              | GLN            | 249            | CA        | 3.56                     | 7.06                               |
| ASN            | 341            | OD1       | -3.90                    | -7.47                              | PHE            | 264            | O         | 3.51                     | 7.01                               |

|     |     |    |       |       |
|-----|-----|----|-------|-------|
| ILE | 66  | CA | -3.70 | 7.28  |
| GLY | 205 | C  | -3.76 | 7.26  |
| ILE | 7   | O  | -3.70 | -7.20 |
| ARG | 301 | CB | -3.51 | -7.02 |

**Supplementary Table 12 | Negative and positive  $F_o^{[pH10]} - F_o^{[pH7]}$  peaks observed on BinB.** Peaks stronger than  $\pm 3.5 \sigma$  were integrated contiguously in the  $F_o^{[pH10]} - F_o^{[pH7]}$  map and then assigned to the closest residue (within a 1.5 Å radius) in the *pH7* (negative peaks) or *pH10* structures (positive peaks).

| Negative peaks |                |           |                          |                                    | Positive peaks |                |           |                          |                                    |
|----------------|----------------|-----------|--------------------------|------------------------------------|----------------|----------------|-----------|--------------------------|------------------------------------|
| Residue name   | Residue number | Atom name | Peak height ( $\sigma$ ) | Integrated peak value ( $\sigma$ ) | Residue name   | Residue number | Atom name | Peak height ( $\sigma$ ) | Integrated peak value ( $\sigma$ ) |
| ASN            | 160            | CA        | -5.66                    | -147.51                            | HIS            | 117            | NE2       | 5.31                     | 232.86                             |
| GLY            | 321            | N         | -4.89                    | -130.14                            | ARG            | 167            | O         | 5.64                     | 196.87                             |
| LYS            | 47             | CA        | -4.82                    | -82.25                             | GLN            | 187            | OE1       | 5.45                     | 173.12                             |
| THR            | 151            | OG1       | -4.96                    | -81.95                             | CYS            | 161            | CB        | 5.82                     | 164.11                             |
| MET            | 75             | SD        | -4.82                    | -75.13                             | PRO            | 61             | N         | 4.73                     | 131.12                             |
| ARG            | 129            | O         | -4.56                    | -63.77                             | ARG            | 122            | CB        | 4.76                     | 124.12                             |
| PRO            | 182            | CA        | -4.62                    | -60.44                             | HIS            | 245            | CB        | 4.11                     | 88.23                              |
| LEU            | 303            | CA        | -4.78                    | -59.56                             | LEU            | 164            | O         | 4.46                     | 68.67                              |
| ASN            | 78             | N         | -4.57                    | -55.80                             | MET            | 255            | SD        | 4.87                     | 56.83                              |
| PHE            | 87             | C         | -4.62                    | -54.69                             | ASP            | 100            | N         | 4.29                     | 54.02                              |
| ASP            | 419            | OD2       | -4.30                    | -49.29                             | ILE            | 176            | CB        | 4.37                     | 50.50                              |
| PHE            | 41             | CG        | -4.51                    | -47.69                             | GLU            | 59             | O         | 4.19                     | 50.37                              |
| CYS            | 67             | CB        | -4.41                    | -45.80                             | GLU            | 347            | OE2       | 4.47                     | 46.98                              |
| CYS            | 241            | C         | -4.40                    | -44.19                             | ARG            | 167            | NE        | 4.31                     | 46.22                              |
| GLU            | 103            | O         | -3.99                    | -41.36                             | ASP            | 246            | OD1       | 4.16                     | 45.24                              |
| THR            | 189            | CG2       | -4.39                    | -38.36                             | ASP            | 77             | CA        | 4.13                     | 42.13                              |
| ASP            | 113            | CA        | -3.99                    | -37.18                             | ASN            | 116            | N         | 4.29                     | 41.87                              |
| LEU            | 334            | O         | -4.10                    | -34.25                             | GLU            | 368            | OE1       | 4.28                     | 38.41                              |
| ARG            | 231            | C         | -4.03                    | -33.91                             | SER            | 63             | OG        | 4.17                     | 38.03                              |
| ILE            | 435            | CA        | -4.15                    | -33.78                             | ILE            | 64             | CB        | 4.08                     | 38.02                              |
| LYS            | 40             | C         | -3.94                    | -33.67                             | PRO            | 178            | O         | 3.92                     | 30.20                              |
| ILE            | 95             | C         | -4.08                    | -33.66                             | ILE            | 85             | CD1       | 4.26                     | 30.09                              |
| ILE            | 96             | C         | -4.35                    | -32.89                             | THR            | 186            | O         | 3.98                     | 30.02                              |
| ALA            | 390            | C         | -4.07                    | -30.98                             | PHE            | 87             | CE2       | 4.05                     | 26.83                              |
| THR            | 410            | CB        | -4.12                    | -30.30                             | GLN            | 296            | N         | 4.07                     | 26.42                              |
| GLU            | 107            | N         | -4.02                    | -29.63                             | ASP            | 106            | OD1       | 4.01                     | 22.44                              |
| ASN            | 33             | O         | -3.81                    | -29.35                             | ARG            | 129            | CD        | 3.94                     | 22.39                              |
| TYR            | 180            | N         | -3.97                    | -29.34                             | PHE            | 147            | CD2       | 3.91                     | 18.87                              |
| SER            | 49             | N         | -4.25                    | -26.84                             | ARG            | 318            | C         | 3.85                     | 18.35                              |
| GLN            | 448            | C         | -4.11                    | -26.39                             | TYR            | 124            | CZ        | 3.78                     | 18.18                              |
| THR            | 58             | CG2       | -4.06                    | -25.97                             | LYS            | 175            | C         | 3.90                     | 15.00                              |
| ALA            | 229            | CB        | -3.87                    | -25.81                             | SER            | 320            | N         | 4.02                     | 14.99                              |
| ASP            | 165            | CA        | -3.78                    | -25.66                             | ASN            | 381            | OD1       | 3.89                     | 14.92                              |
| ILE            | 85             | C         | -3.92                    | -22.29                             | VAL            | 230            | CG1       | 3.90                     | 14.89                              |
| ASP            | 106            | CG        | -3.75                    | -21.87                             | ARG            | 288            | NH2       | 3.82                     | 14.60                              |

|     |     |     |       |        |
|-----|-----|-----|-------|--------|
| GLU | 133 | C   | -3.86 | -18.81 |
| GLN | 286 | CG  | -3.90 | -18.72 |
| PRO | 61  | C   | -4.04 | -18.69 |
| PRO | 205 | CG  | -3.94 | -18.66 |
| ILE | 120 | CG1 | -4.03 | -18.43 |
| ALA | 97  | C   | -3.71 | -18.06 |
| ASP | 220 | OD1 | -3.90 | -15.32 |
| TYR | 76  | C   | -3.97 | -15.32 |
| SER | 73  | CA  | -3.93 | -15.01 |
| THR | 125 | OG1 | -3.91 | -14.86 |
| THR | 173 | CB  | -3.76 | -14.74 |
| PRO | 118 | CG  | -3.74 | -14.63 |
| ARG | 167 | C   | -3.89 | -14.57 |
| ALA | 163 | CA  | -3.84 | -14.55 |
| ASN | 297 | CG  | -3.73 | -14.52 |
| ASN | 78  | CG  | -3.73 | -14.51 |
| GLY | 342 | O   | -3.70 | -14.44 |
| TYR | 260 | O   | -3.66 | -14.30 |
| PHE | 146 | CD1 | -3.85 | -11.17 |
| PRO | 61  | CA  | -3.77 | -11.06 |
| LEU | 158 | C   | -3.79 | -10.89 |
| GLN | 130 | CA  | -3.66 | -10.84 |
| GLN | 393 | CB  | -3.61 | -10.71 |
| ASN | 331 | N   | -3.63 | -10.69 |
| THR | 168 | O   | -4.14 | -7.97  |
| GLU | 128 | OE1 | -3.80 | -7.55  |
| GLY | 92  | C   | -3.76 | -7.43  |
| TYR | 418 | CD1 | -3.81 | -7.40  |
| ILE | 176 | CA  | -3.71 | -7.37  |
| ASN | 160 | CB  | -3.71 | -7.37  |
| LYS | 57  | NZ  | -3.74 | -7.29  |
| HIS | 409 | CG  | -3.66 | -7.28  |
| TYR | 48  | CG  | -3.71 | -7.24  |
| ASP | 100 | OD2 | -3.61 | -7.15  |
| PHE | 87  | CZ  | -3.57 | -7.11  |
| ARG | 332 | CB  | -3.56 | -7.11  |

|     |     |     |      |       |
|-----|-----|-----|------|-------|
| TYR | 53  | CE1 | 3.73 | 14.58 |
| GLN | 325 | CA  | 3.76 | 14.53 |
| HIS | 117 | ND1 | 3.67 | 14.40 |
| PRO | 226 | C   | 3.81 | 11.21 |
| THR | 327 | OG1 | 3.77 | 11.12 |
| PRO | 396 | CA  | 3.82 | 11.07 |
| ARG | 318 | CG  | 3.80 | 11.06 |
| LYS | 284 | O   | 3.76 | 11.01 |
| ARG | 99  | N   | 3.69 | 10.95 |
| ASN | 160 | ND2 | 3.76 | 10.89 |
| ILE | 169 | CD1 | 3.65 | 10.75 |
| LEU | 389 | CG  | 3.60 | 10.64 |
| PHE | 83  | CG  | 3.84 | 7.48  |
| LEU | 171 | N   | 3.83 | 7.40  |
| TYR | 418 | CD2 | 3.80 | 7.39  |
| ASN | 352 | OD1 | 3.79 | 7.32  |
| ASN | 51  | CA  | 3.63 | 7.26  |
| PHE | 191 | CD1 | 3.67 | 7.25  |
| TYR | 72  | CD2 | 3.66 | 7.23  |
| GLY | 92  | CA  | 3.60 | 7.13  |
| ILE | 169 | CG1 | 3.56 | 7.11  |
| GLU | 103 | CA  | 3.60 | 7.11  |
| VAL | 436 | C   | 3.55 | 7.05  |

**Supplementary Table 13 | Toxicity of wild type (BinAB) and mutated (BinA<sup>D22N</sup>B) strains of *Lysinibacillus sphaericus* against 4<sup>th</sup>-instar larvae of *Culex quinquefasciatus*<sup>a</sup>.** At the LC<sub>50</sub> and LC<sub>95</sub> levels, the mutant strain BinA<sup>D22N</sup>B is 11.6 and 24 fold less toxic than the wild-type, respectively. An aspartic acid at position 22 in BinA is thus critical to the toxicity.

| Bacterial Strain<br>(Toxins produced)                                            | LC <sub>50</sub> (Fiducial Limits) | LC <sub>95</sub> (Fiducial Limits) | Slope     |
|----------------------------------------------------------------------------------|------------------------------------|------------------------------------|-----------|
| <i>Lysinibacillus sphaericus</i><br>4Q7/pBUSP-1 (BinAB)                          | 9.9<br>(7.1 – 13.4)                | 51.8<br>(32.9 – 116.1)             | 2.3 ± 0.4 |
| <i>Lysinibacillus sphaericus</i><br>4Q7/pBUSP-1 D22N<br>(BinA <sup>D22N</sup> B) | 115.5<br>(49.4 – 273.4)            | 1,268.2<br>(200.9 – 10,071.7)      | 1.6 ± 0.4 |

<sup>a</sup> 48 hr-mortality, ng/ml

### Supplementary Table 14 | Refinement statistics for the model obtained from Molecular Replacement.

|                                     | Native,<br>pH 7    |
|-------------------------------------|--------------------|
| <b>Refinement</b>                   |                    |
| Refinement target function          | Maximum-likelihood |
| Resolution (Å)                      | 2.25 (2.31-2.25)   |
| Number of reflections               | 52257              |
| $R_{\text{work}} / R_{\text{free}}$ | 0.158 / 0.203      |
| Number of atoms                     |                    |
| Protein                             | 6340               |
| Water                               | 283                |
| B-factors (Å <sup>2</sup> )         |                    |
| Protein (BinA/BinB)                 | 47.1 / 41.1        |
| Water                               | 43.8               |
| R.m.s. deviations                   |                    |
| Bond lengths (Å)                    | 0.01               |
| Bond angles (°)                     | 1.2                |
